# Supplementary material
Source: PubMed Central journal article supplement (PMC6460490)
Supplement: 41423_2018_161_MOESM1_ESM.pdf [file 41423_2018_161_MOESM1_ESM.pdf]

# Human Dendritic cell-specific ICAM-3-grabbing non-integrin downstream signaling alleviates renal fibrosis via Raf-1 activation in systemic candidiasis

Wen-Yu Chen, Sheng-Yang Wu, Ta-Chun Lin, Shuei-Liong Lin and Betty A. Wu-Hsieh\*

\*Correspondence: bwh@ntu.edu.tw

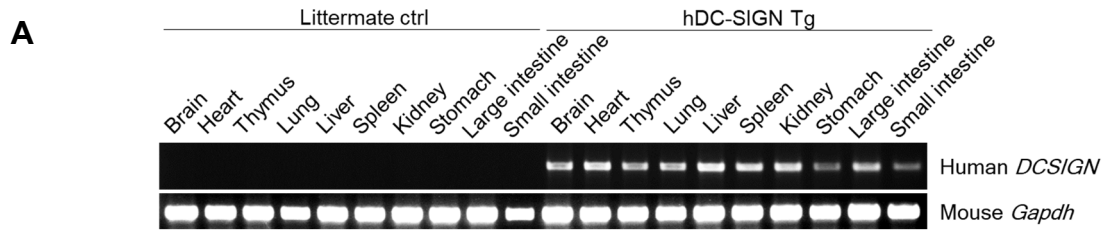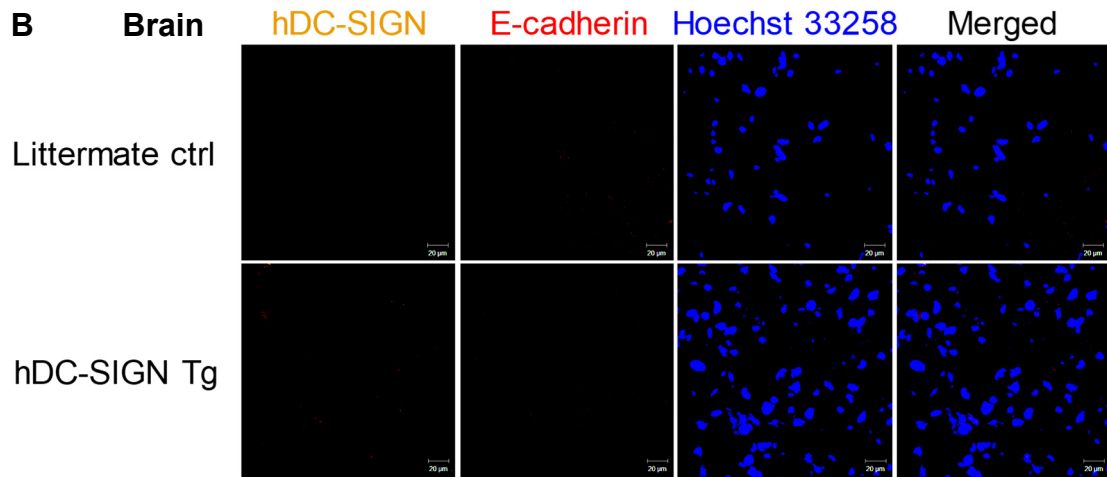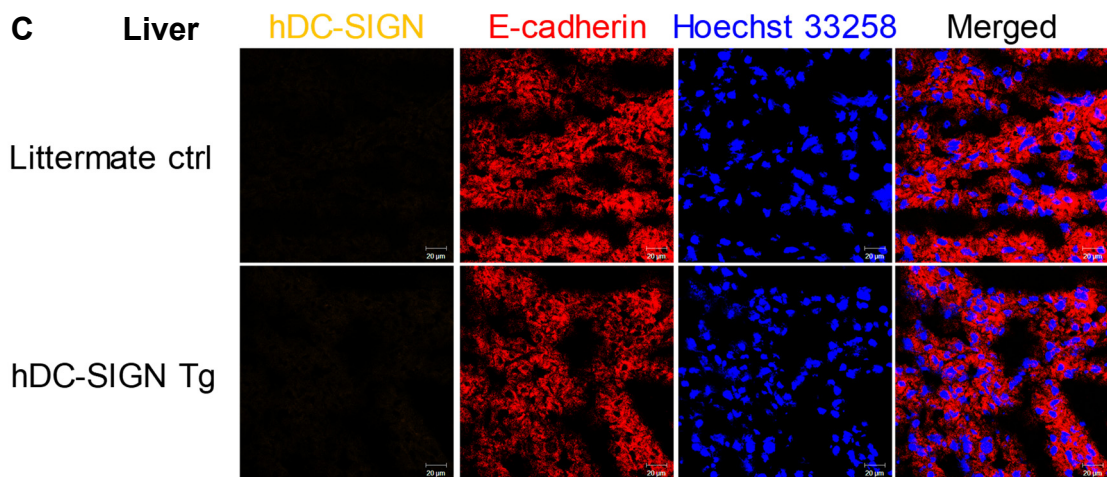

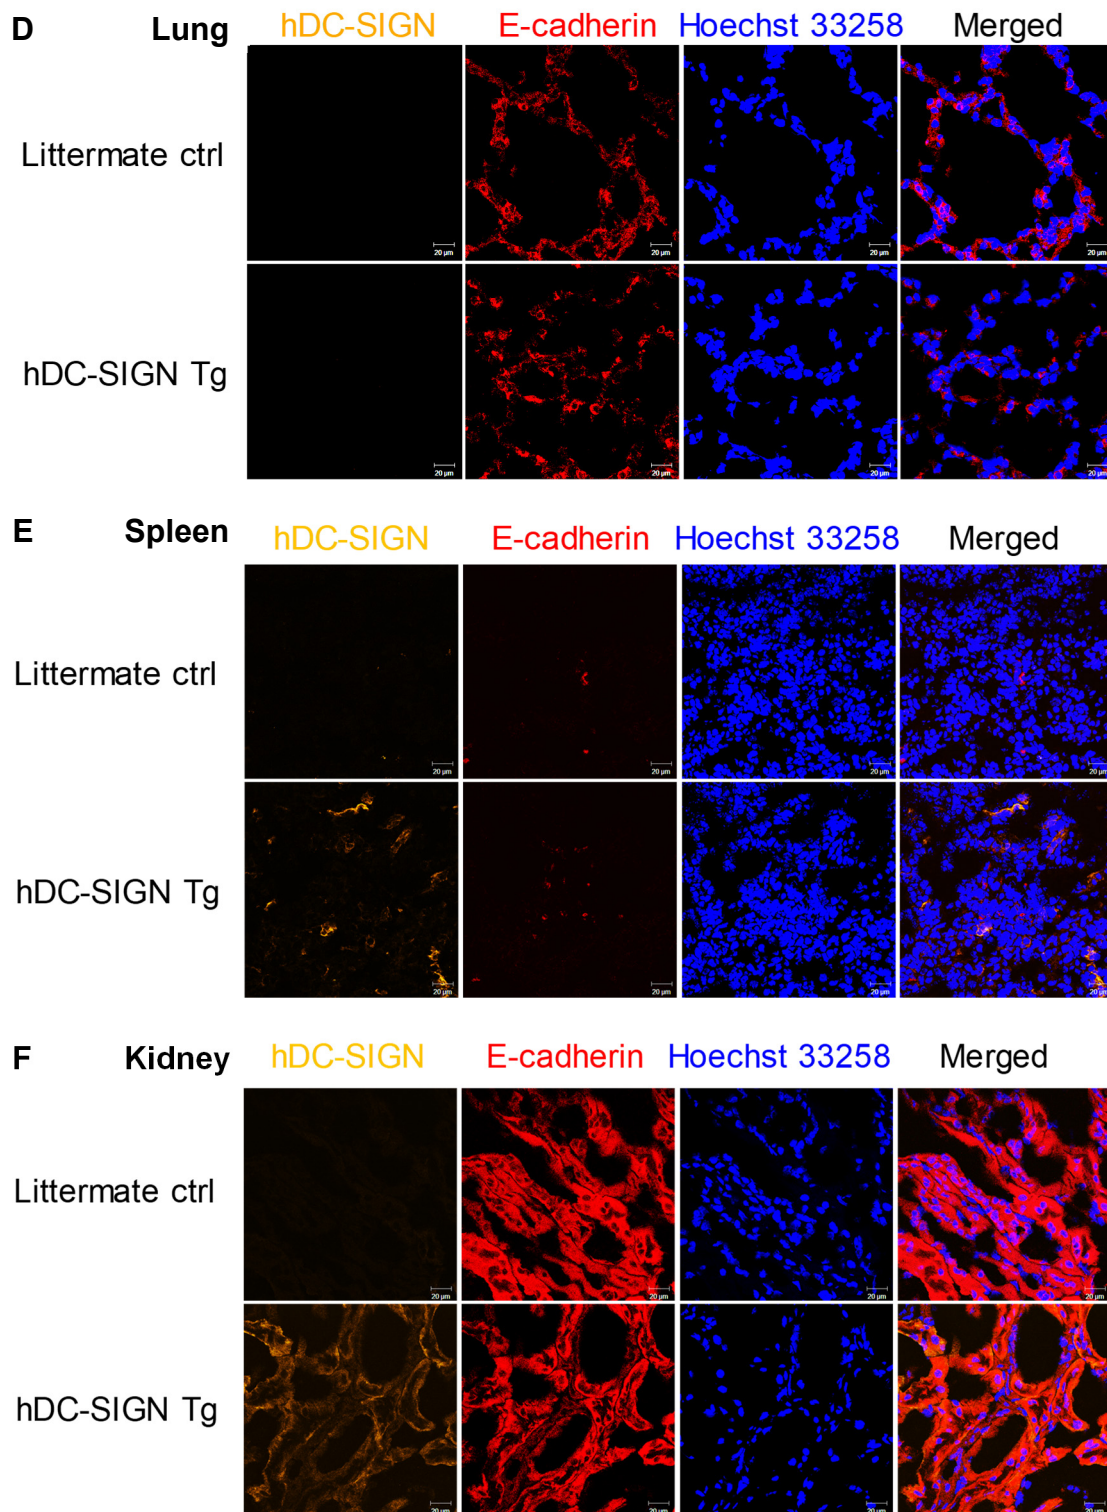

**Suppl Figure 1. The expression of hDC-SIGN mRNA and protein in organs of hDC-SIGN transgenic mice.** Different organs from naïve hDC-SIGN transgenic and littermate ctrl mice were collected after perfusion with PBS. (A) Human *DCSIGN* mRNA expression in the organs are shown. Mouse *Gapdh* mRNA expression were as an internal control. Cryosections of (B) brain, (C) liver, (D) lung, (E) spleen and (F) kidney were stained for hDC-SIGN (orange) and E-cadherin (red) and nuclei (Hoechst 33258, blue). Slides were read under a confocal microscope. Original magnification,  $\times 400$ . Scale bar = 20  $\mu\text{m}$ .

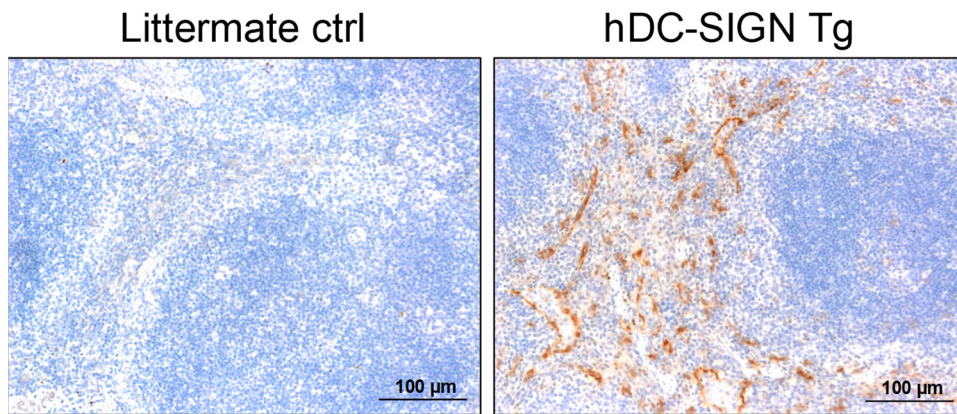

**Suppl Figure 2. hDC-SIGN is expressed in the marginal zone of the spleen of hDC-SIGN transgenic mice.** Spleens from naïve hDC-SIGN transgenic and littermate control mice were collected after perfusion with PBS. Paraffin-embedded spleen sections were stained for human DC-SIGN (brown). Slides were counterstained with hematoxylin (blue). Original magnification,  $\times 200$ . Scale bar = 100  $\mu\text{m}$ .

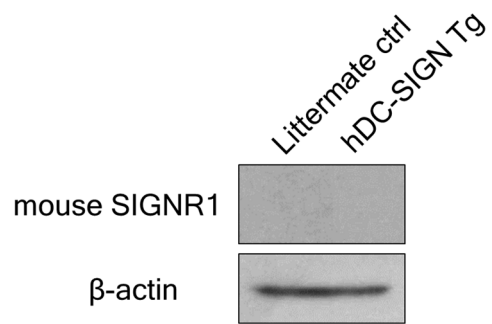

**Suppl Figure 3. hDC-SIGN transgenic expression does not induce SIGNR1 expression in the kidney.** After perfusion with PBS, kidneys were collected from naïve hDC-SIGN transgenic and littermate control mice. Kidney homogenates were subjected to Western blot analysis for SIGNR1 expression.  $\beta$ -actin was used as an internal control.



**A**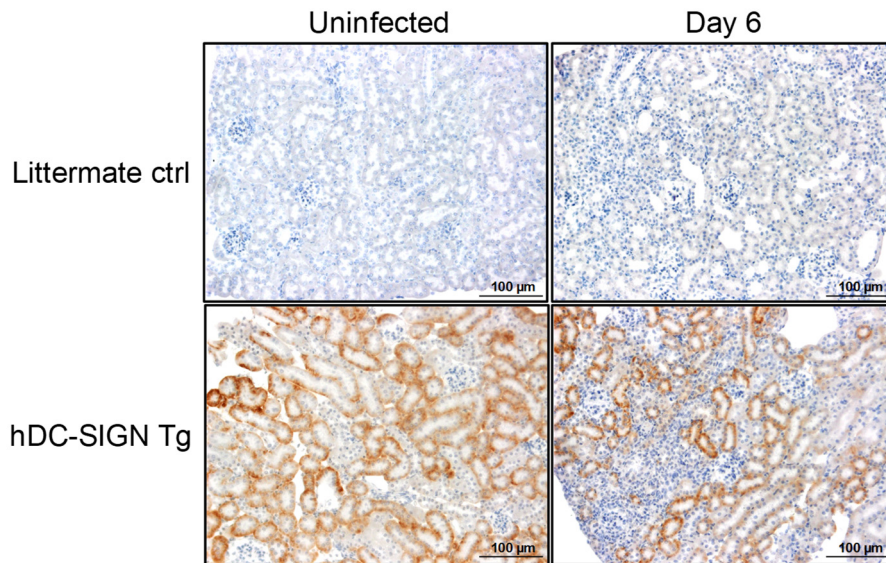**B**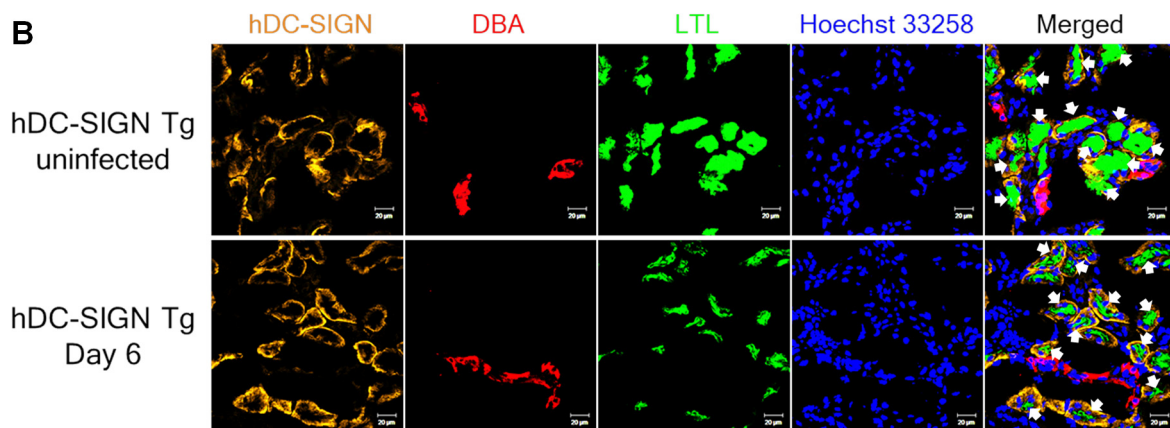

**Suppl Figure 4. *C. albicans* infection does not change the intensity of hDC-SIGN expression in LTL<sup>+</sup> cells in the tubule.** hDC-SIGN transgenic and littermate control mice were infected with  $1 \times 10^5$  of *C. albicans* intravenously. On day 6 after infection, mice were perfused with PBS and kidneys were collected. **(A)** Paraffin-embedded kidney sections were stained for hDC-SIGN expression (brown). Slides were counterstained with hematoxylin (blue). Original magnification,  $\times 200$ . Scale bar = 100  $\mu\text{m}$ . **(B)** Cryosections of kidneys were stained for hDC-SIGN (orange), DBA (red), LTL (green), and nuclei (Hoechst 33258, blue). DBA and LTL mark distal and proximal tubule in renal cortex, respectively. White arrows point to hDC-SIGN<sup>+</sup> cells. Slides were read under a confocal microscope. Original magnification,  $\times 400$ . Scale bar = 20  $\mu\text{m}$ . Images of uninfected hDC-SIGN transgenic and littermate control mice in (A) are from Figure 1C.

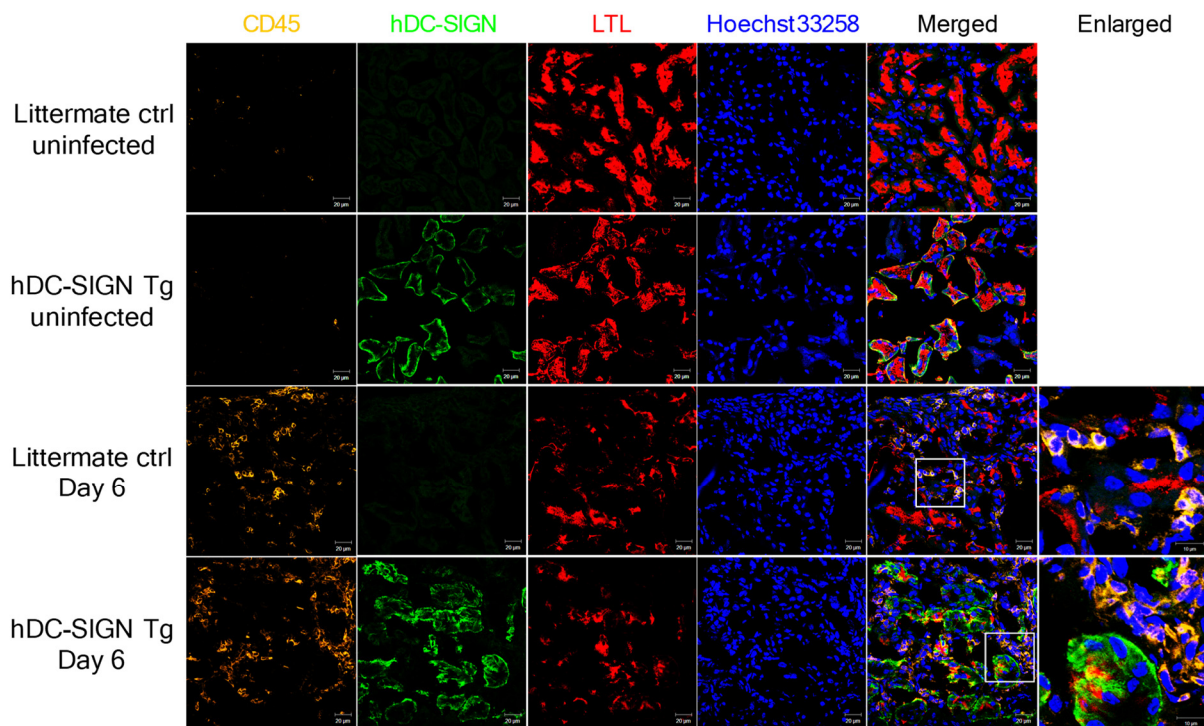

**Suppl Figure 5. CD45<sup>+</sup> infiltrating cells in *C. albicans*-infected transgenic mice are hDC-SIGN-negative.** hDC-SIGN transgenic and littermate control mice were infected with  $1 \times 10^5$  of *C. albicans* intravenously. On day 6 after infection, mice were perfused with PBS and kidneys were collected. Cryosections of kidneys were stained for CD45 (orange), hDC-SIGN (green) and LTL (red). Hoechst 33258 was used as a nuclear counterstain (blue). Boxed areas are shown at higher magnification (enlarged) next to the corresponding image. Slides were read under a confocal microscope. Original magnification,  $\times 400$ . Scale bar = 20  $\mu\text{m}$  (scale bar of enlarged graph = 10  $\mu\text{m}$ ).

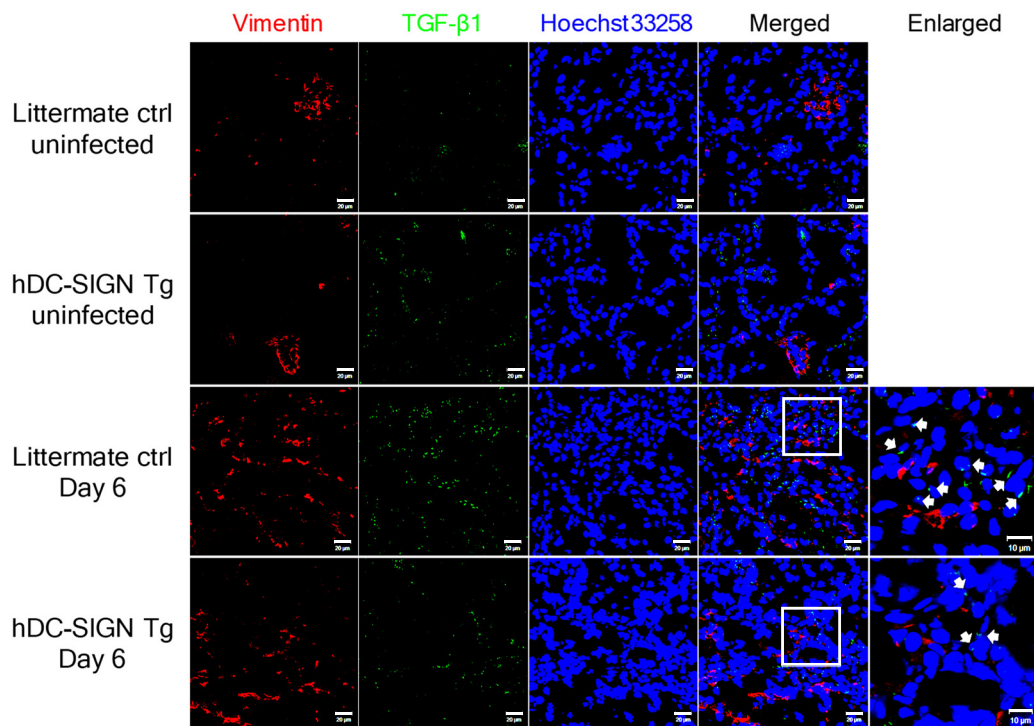

**Suppl Figure 6. Mesenchymal cells are not the source of renal TGF-β1 in *C. albicans* infection.** hDC-SIGN transgenic and littermate control mice were infected with  $1 \times 10^5$  of *C. albicans* intravenously. On day 6 after infection, mice were perfused with PBS and kidneys were collected. Cryosections of kidneys were stained for vimentin (red), TGF-β1 (green), and nuclei (Hoechst 33258, blue). Boxed areas are shown at higher magnification (enlarged) next to the corresponding image. Slides were read under a confocal microscope. Original magnification,  $\times 400$ . Scale bar =  $20 \mu\text{m}$  (scale bar of enlarged graph =  $10 \mu\text{m}$ ). White arrows point to TGF-β1<sup>+</sup> cells.

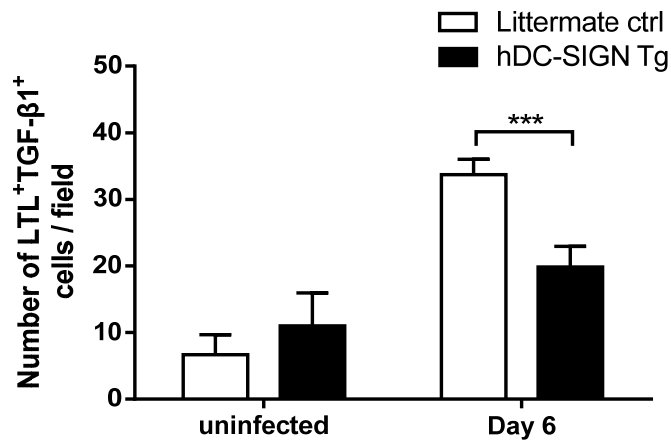

**Suppl Figure 7. The numbers of LTL<sup>+</sup>TGF-β1<sup>+</sup> cells in kidneys of hDC-SIGN transgenic and littermate control mice before and after infection.** Kidneys from uninfected and *C. albicans*-infected hDC-SIGN transgenic (day 6 after infection) and littermate control mice were collected after whole body perfusion. Cryosections were stained for LTL, TGF-β1 and nuclei. LTL<sup>+</sup>TGF-β1<sup>+</sup> cells were counted in total of 20 fields in 2 kidney sections per group. The bars represent the mean ± SEM. Data were analyzed by two-way ANOVA followed by Tukey post-hoc test. \*\*\*  $p < 0.001$ .



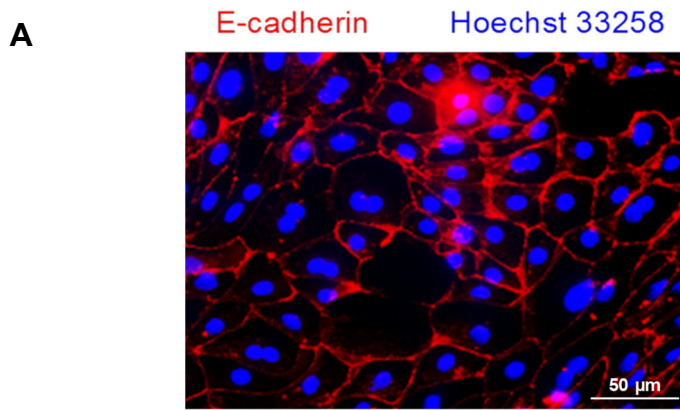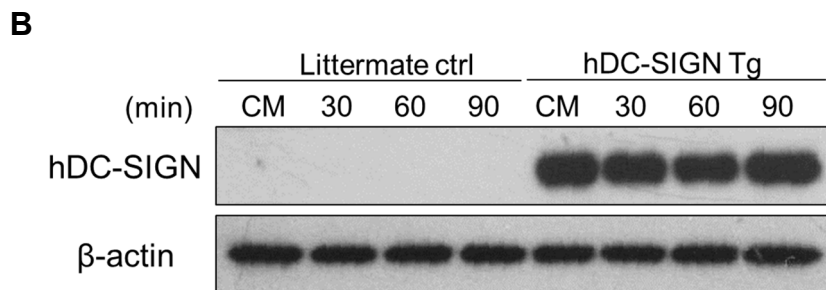

**Suppl Figure 8. *C. albicans* infection does not change the expression of hDC-SIGN in primary renal epithelial cells.** (A) Primary renal tubular epithelial cells were isolated from wild type mice. Cells were seeded on cover slides, and stained for E-cadherin (red). Nuclei (blue) were stained with Hoechst 33258. Slides were read under a fluorescence microscope. Original magnification,  $\times 400$ . Scale bar = 50  $\mu\text{m}$ . (B) Primary renal tubular epithelial cells were isolated from hDC-SIGN transgenic and littermate control mice. Cells were stimulated with *C. albicans* for 0, 30, 60 and 90 min. Levels of hDC-SIGN expression in the cell lysates were analyzed by Western blotting.  $\beta$ -actin was used as an internal control.

## Supplementary Methods

### RT-PCR

Total RNA was extracted from different tissues in RNazol RT (Molecular Research Center). cDNA was reversely transcribed in reaction mixture containing extracted RNA, first-strand buffer, DTT, dNTP, random primers (Protech), SuperScript III reverse transcriptase (Invitrogen) and RNaseOUT recombinant ribonuclease inhibitor (Invitrogen) in RNase-free H<sub>2</sub>O. cDNA was amplified in Veriti 96-Well Thermal Cycler (Applied Biosystems) with total volume of 20 µl per reaction in buffer containing Platinum Taq DNA Polymerase (Thermo Fisher Scientific). Primers for human *DCSIGN* gene are 5'-CTGCAACTCCTCTCCTTCAC-3' (forward) and 5'-TCGTTCCAGCCATTGCCACT-3' (reverse) and for mouse *Gapdh* gene are 5'-ACCACAGTCCATGCCATCAC-3' (forward) and 5'-TCCACCACCCTGTTGCTGTA-3' (reverse). The amplicon sizes of human *DCSIGN* gene and mouse *Gapdh* gene are 965 bp and 452 bp, respectively.

**Western blotting.** PhosphoSafe Extraction Reagent (Millipore) were used to homogenize perfused kidneys and lyse primary renal tubular epithelial cells. Whole cell lysates and kidney homogenates were subjected to electrophoresis at 10% sodium dodecyl sulfate polyacrylamide gel (SDS-PAGE), and transferred to 0.45 µm PVDF membrane. The membrane was blocked with 5% non-fat milk diluted in TBST and incubated in TBST containing rabbit anti-human DC-SIGN (1:1000) (abcam), rat anti-mouse SIGNR1 (1:200) (BioLegend) or rabbit anti-mouse β-actin antibody (1:10000) (GeneTex) at 4°C overnight, followed by addition of HRP-conjugated secondary antibody (1:20000) (GeneTex). The blot was developed by chemiluminescence using ECL solution (Millipore).
